# Supplementary material for: Magnetic collagen fibers stabilized using functional iron oxide nanoparticles in non-aqueous medium
Source: Royal Society of Chemistry journal article supplement (doi:10.1039/c4ra16181e), 2015-01-01
Supplement: c4ra16181e2.pdf [file c4ra16181e2.pdf]

**Electronic Supplementary Information**

**Magnetic collagen fibers stabilized using functional iron oxide nanoparticles in non-aqueous medium**

**C. Alliraja, J. Raghava Rao and P. Thanikaivelan\***

**Fig. S1.** (a) Absorbance and (b) reflectance spectra of as-synthesized IOOANP sample.

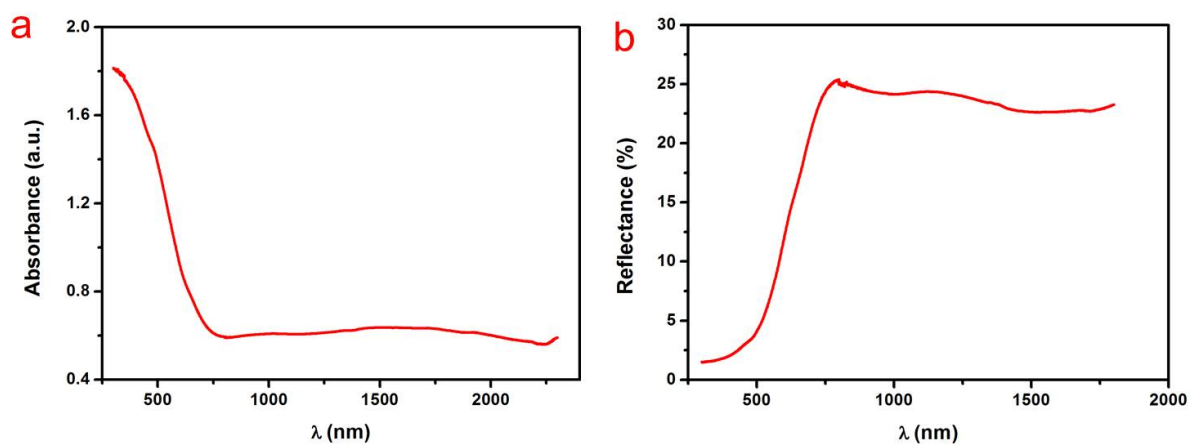

**Fig. S2.** Coercivity of as-synthesized (a) IONP and (b) IOOANP in M-H curve probed using a vibrating sample magnetometer.

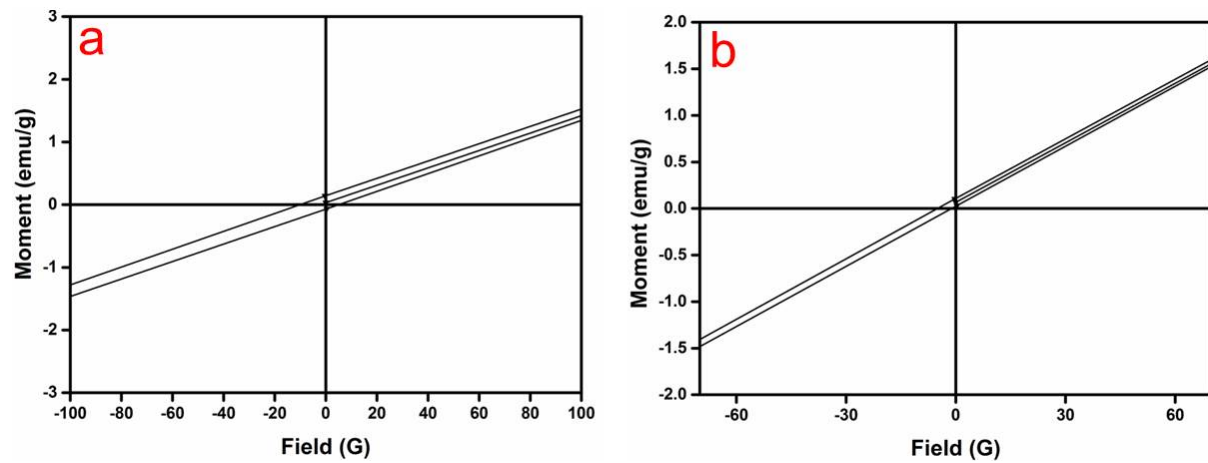

**Fig. S3.** Coercivity of collagen fibers treated with IOOANP in M-H curve probed using a vibrating sample magnetometer.

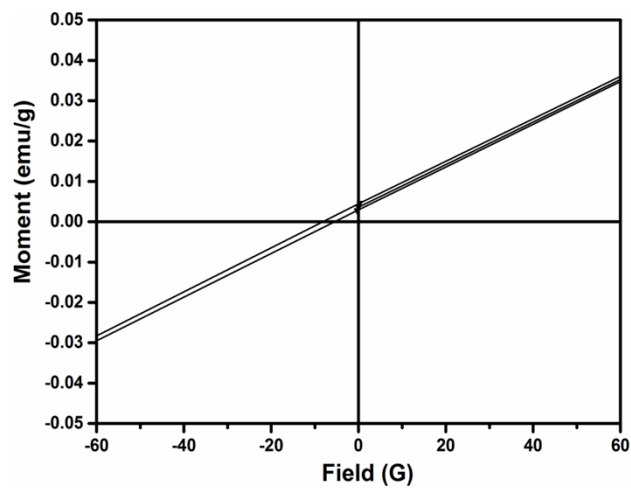

### **List of Supplementary Movies**

**Movie S1:** Video showing the ability of magnetic collagen fibers for selective removal of oil from used motor oil-water mixture and tracking under magnetic field.
